# Supplementary material
Source: Springer Nature journal article supplement (https://www.springermedizin.de/resource/supplementary/12889_2011_3855_MOESM2_ESM.pdf/9493284)

Favourable shifts in risk factors

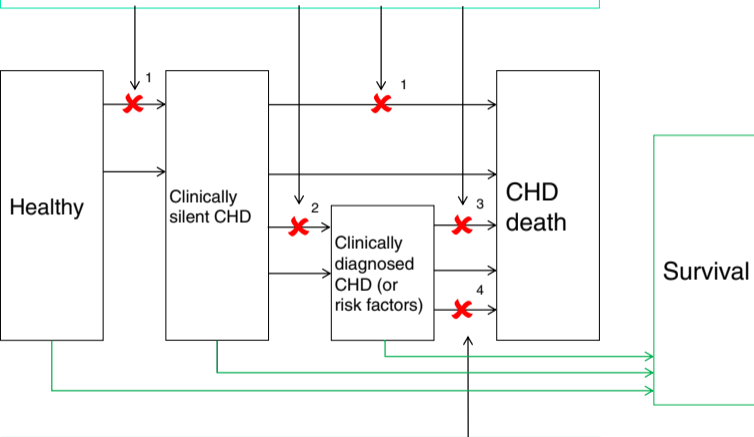

More effective treatment

Supplement: MOESM2 [file 9493284]
